# Supplementary material for: Ion diffusion mechanism in Pn NaxLi2−xMnSiO4
Source: Royal Society of Chemistry journal article supplement (doi:10.1039/c4ce02462a), 2015-01-01
Supplement: c4ce02462a1.pdf [file c4ce02462a1.pdf]

## Supplementary Information

### Ion Diffusion Mechanism in *Pn* $\text{Na}_x\text{Li}_{2-x}\text{MnSiO}_4$

Peng Zhang, Yixu Xu, Feng Zheng, S.Q. Wu,\* Yong Yang and Zi-Zhong Zhu\*

We have performed the bader analysis<sup>S1-S3</sup> of the charge population around A1 and A2 sites (see Fig.1) in  $\text{Na}_x\text{Li}_{2-x}\text{MnSiO}_4$  ( $x = 2, 1, 0$ ), as shown in Table S1. It is shown that compared with that in  $\text{Li}_2\text{MnSiO}_4$ , there are a little more charge accumulated around the A1 (or A2) site in  $\text{Na}_2\text{MnSiO}_4$ , indicating more covalent Na-O bonds than Li-O bonds. However, the atomic volume around the A1 (A2) site in  $\text{Na}_2\text{MnSiO}_4$  is significantly larger (~ three times) than that in  $\text{Li}_2\text{MnSiO}_4$ , which is consistent with our bond length analysis and conclusions that  $\text{Na}_2\text{MnSiO}_4$  can supply wider ionic diffusion channels than  $\text{Li}_2\text{MnSiO}_4$ .

**Table S1. Calculated bader charge and atomic volume**

|               | $\text{Li}_2\text{MnSiO}_4$ |       | $\text{Na}_2\text{MnSiO}_4$ |       | $\text{NaLiMnSiO}_4$ |       |
|---------------|-----------------------------|-------|-----------------------------|-------|----------------------|-------|
|               | A1                          | A2    | A1                          | A2    | A1                   | A2    |
| Charge        | 0.138                       | 0.146 | 0.186                       | 0.196 | 0.139                | 0.194 |
| Atomic Volume | 3.364                       | 3.215 | 9.275                       | 8.904 | 3.359                | 8.660 |

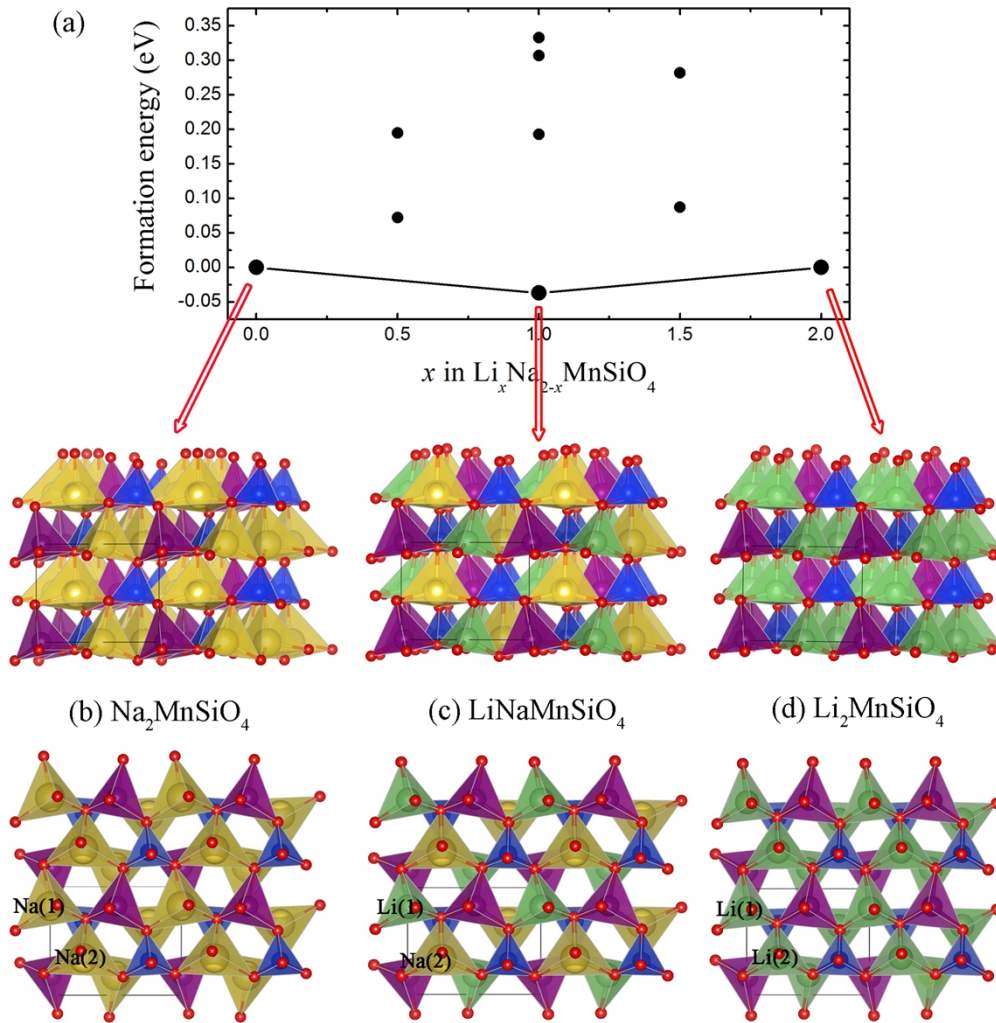

**Fig. S1** (a) Calculated formation energies of  $\text{Li}_x\text{Na}_{2-x}\text{MnSiO}_4$  ( $0 < x < 2$ ) structures. The stable configurations are given in (b)  $\text{Na}_2\text{MnSiO}_4$  (c)  $\text{LiNaMnSiO}_4$  and (d)  $\text{Li}_2\text{MnSiO}_4$ .

The calculated formation energies of several  $\text{Li}_x\text{Na}_{2-x}\text{MnSiO}_4$  structures with different  $x$  values within one unit cell are shown in Fig. S1. It is shown that for  $\text{NaLiMnSiO}_4$ , only the structural with  $\text{Li}^+$  and  $\text{Na}^+$  ions respectively occupying the A1 and A2 sites is stable, with respect to the decomposition to  $\text{Li}_2\text{MnSiO}_4$  and  $\text{Na}_2\text{MnSiO}_4$ . Moreover, this stable configuration can well reproduce the experimental results reported by Duncan et al (ref. 16 in main paper). Thus the further calculations in this work are based on it.

## References

- S1. G. Henkelman, A. Arnaldsson and H. Jónsson, *Computational Materials Science*, 2006, **36**, 354-360.
- S2. E. Sanville, S. D. Kenny, R. Smith and G. Henkelman, *J. Comput. Chem.*, 2007, **28**, 899-908.
- S3. W. Tang, E. Sanville and G. Henkelman, *J. Phys.: Condens. Matter*, 2009, **21**, 084204.
